# Supplementary material
Source: PubMed Central journal article supplement (PMC5745674)
Supplement: PEDS_20171026MSupplementaryData.pdf [file PEDS_20171026MSupplementaryData.pdf]

# Supplemental Information

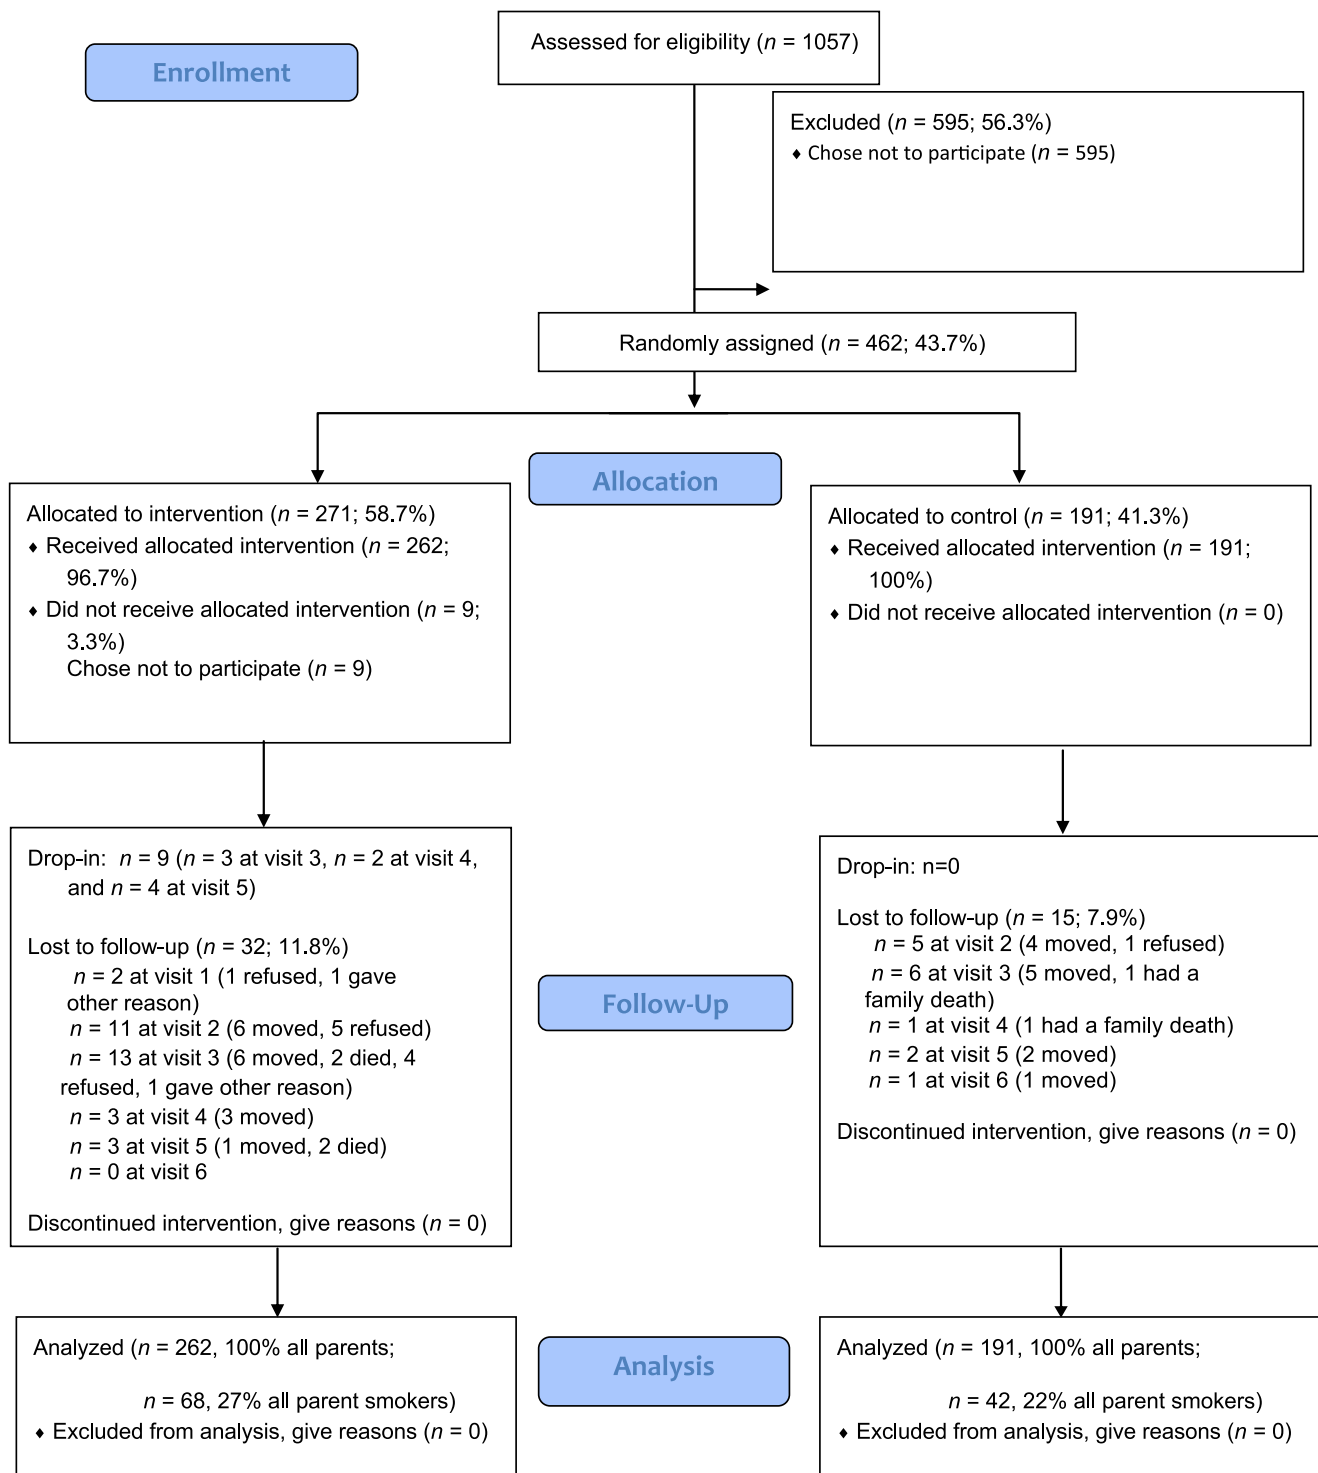

**SUPPLEMENTAL FIGURE 4**

Consolidated Standards of Reporting Trials flow diagram of P/C enrollment.
